# Supplementary material for: Management of waste crustacean shells for the construction of a carbon-negative circulation model
Source: Royal Society of Chemistry journal article supplement (doi:10.1039/d3se01218b), 2024-01-01
Supplement: d3se01218b1.pdf [file d3se01218b1.pdf]

## Supplementary material

### For Sustainable Energy & Fuels

#### Management of waste crustacean shells for the construction of a carbon-negative circulation model

Xiaogang Sun <sup>ab,1</sup>, Zhen Du <sup>a,1</sup>, Yimeng Wang <sup>b</sup>, Yuepeng Guan <sup>b,\*</sup>, Baoning Zhu <sup>a,\*</sup>, Yaqin Huang <sup>a,\*</sup>

<sup>a.</sup> Beijing Laboratory of Biomedical Materials, Beijing Key Laboratory of Electrochemical Process and Technology for Materials, Beijing Engineering Center for Environmental Pollution Control and Resource Utilization, Beijing University of Chemical Technology, Beijing 100029, People's Republic of China.

<sup>b.</sup> Beijing Key Laboratory of Clothing Materials R&D and Assessment, Beijing Engineering Research Center of Textile Nano Fiber, Beijing Institute of Fashion Technology, Beijing, 100029, People's Republic of China.

<sup>1</sup>These authors contributed equally to this work and should be considered co-first author.

\* Corresponding author

E-mail:

huangyq@mail.buct.edu.cn (Yaqin Huang)

bnzhu@mail.buct.edu.cn (Baoning Zhu);

20210007@bift.edu.cn (Yuepeng Guan);

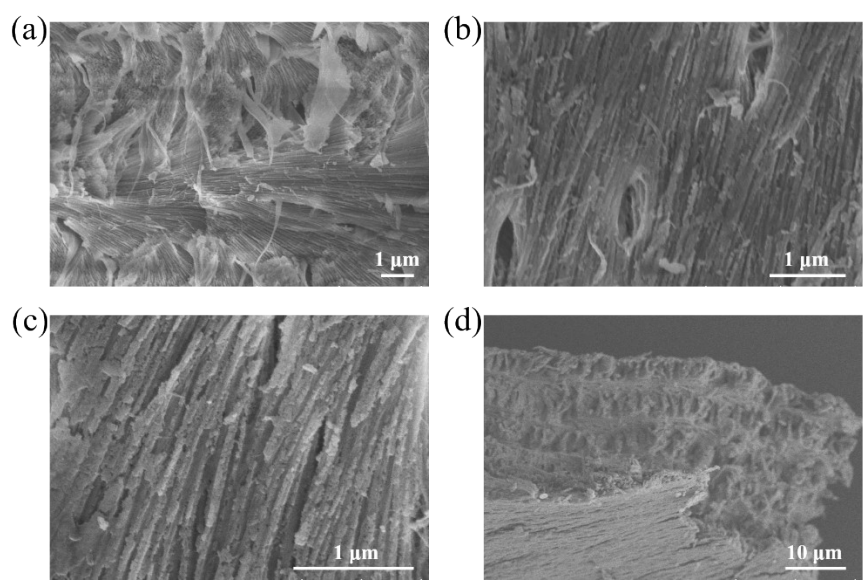

**Figure S1.** SEM images of WCS.

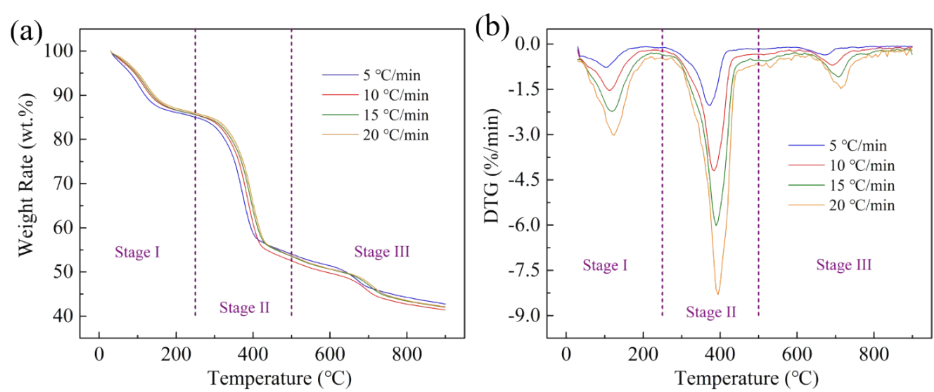

**Figure S2.** (a) TG and (b) DTG curves of WCS pyrolysis process at four different heating rates.

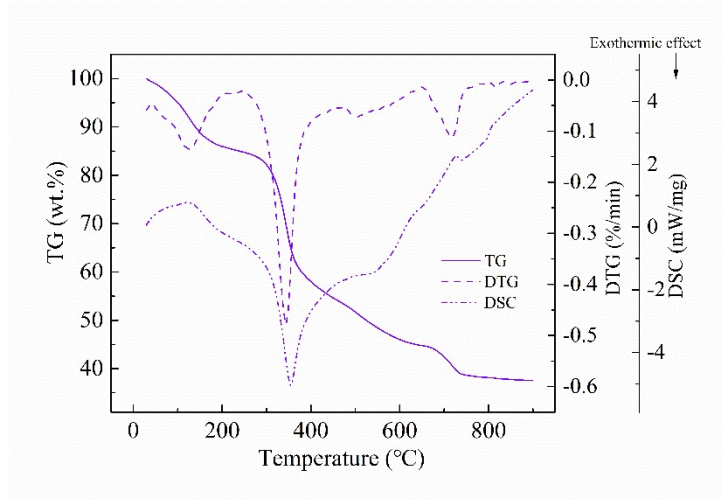

**Figure S3.** TG, DTG, and DSC curves of WCS pyrolysis process under air atmosphere at the heating rate of 10 °C/min.

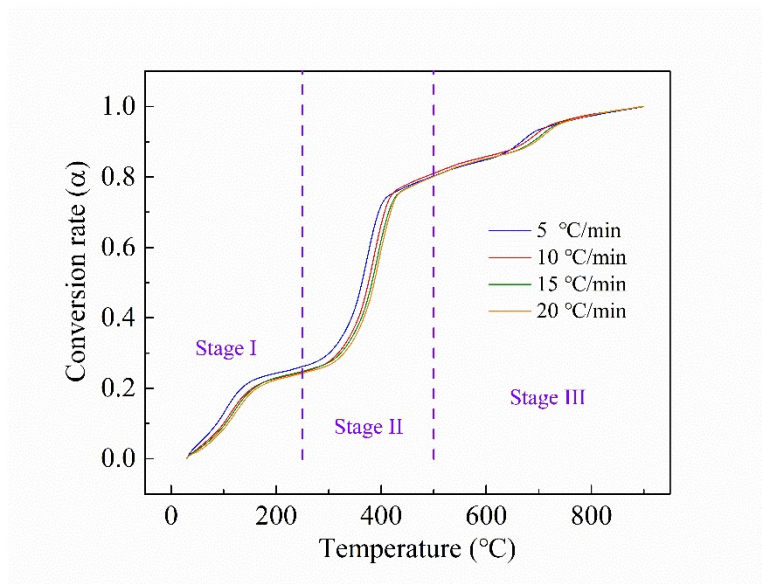

**Figure S4.** Changes of conversion rates to temperature at different heating rates.

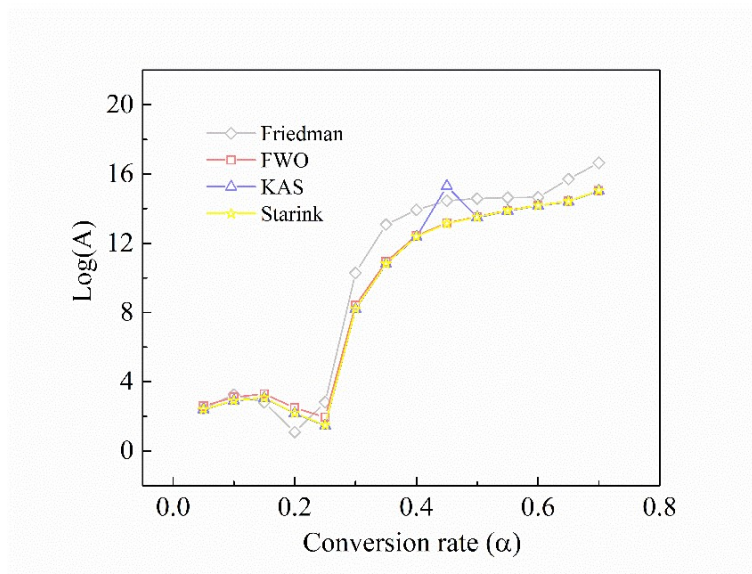

**Figure S5.** Comparison of experimental master plots of  $[f(\alpha)g(\alpha)/f(0.5)g(0.5)]$  against  $\alpha$  of WCS pyrolysis process with theoretical master curves of  $[f(\alpha)g(\alpha)]$  against  $\alpha$ .

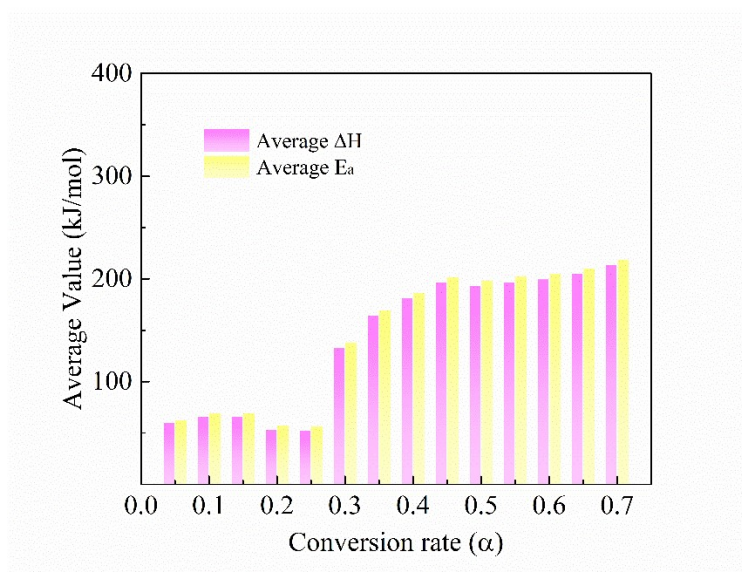

**Figure S6.** Changes of average values of  $\Delta H$  and  $E_a$  of WCS pyrolysis process at different conversion rates.

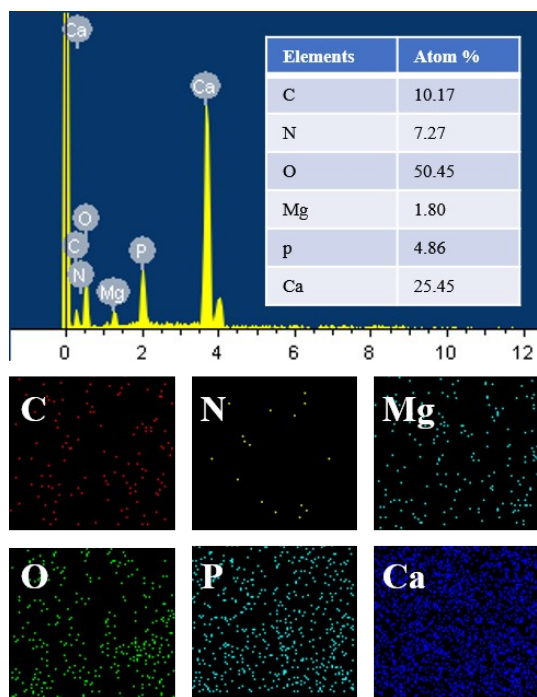

**Figure S7.** EDS analysis and elements mapping of WCS-750 (corresponding to Fig. 4a).

**Table S1**

Peaks and corresponding compounds in chromatograms of volatile products of WCS pyrolyzed at 125, 410 and 730 °C.

| Peak number # | Reaction time (min) | Compound                                                          | Molecular formula                                              | CAS#        | Peak area (%) |
|---------------|---------------------|-------------------------------------------------------------------|----------------------------------------------------------------|-------------|---------------|
| <b>125 °C</b> |                     |                                                                   |                                                                |             |               |
| 1             | 1.37                | Water                                                             | H <sub>2</sub> O                                               | 7732-18-5   | 88.74         |
| <b>410 °C</b> |                     |                                                                   |                                                                |             |               |
| 1             | 1.30                | L-alanylglycine                                                   | C <sub>5</sub> H <sub>10</sub> N <sub>2</sub> O <sub>3</sub>   | 687-69-4    | 14.11         |
| 2             | 1.39                | D-alanine                                                         | C <sub>3</sub> H <sub>7</sub> NO <sub>2</sub>                  | 338-69-2    | 9.87          |
| 3             | 2.25                | Oxaluric acid                                                     | C <sub>3</sub> H <sub>4</sub> N <sub>2</sub> O <sub>4</sub>    | 585-05-7    | 3.68          |
| 4             | 2.98                | (S)-amphetamine                                                   | C <sub>9</sub> H <sub>13</sub> N                               | 51-64-9     | 0.57          |
| 5             | 4.04                | Acetamide                                                         | C <sub>2</sub> H <sub>5</sub> NO                               | 60-35-5     | 8.07          |
| 6             | 4.76                | 2,4-dihydropyridine                                               | C <sub>5</sub> H <sub>5</sub> NO <sub>2</sub>                  | 626-03-9    | 0.84          |
| 7             | 5.74                | 2-ethyl-4,5-dimethyloxazole                                       | C <sub>7</sub> H <sub>11</sub> NO                              | 53833-30-0  | 1.41          |
| 8             | 6.36                | 2,6,8-trihydroxypurine                                            | C <sub>5</sub> H <sub>4</sub> N <sub>4</sub> O <sub>3</sub>    | 69-93-2     | 0.46          |
| 9             | 7.31                | N-acetylglycine                                                   | C <sub>4</sub> H <sub>7</sub> NO <sub>3</sub>                  | 543-24-8    | 0.85          |
| 10            | 7.91                | 1-(methylsulfonyl)piperazine                                      | C <sub>5</sub> H <sub>12</sub> N <sub>2</sub> O <sub>2</sub> S | 55276-43-2  | 3.00          |
| 11            | 8.42                | Acetic acid                                                       | C <sub>12</sub> H <sub>20</sub> O <sub>2</sub>                 | 3465-88-1   | 0.90          |
| 12            | 8.79                | N-(hydroxymethyl)nicotinamide                                     | C <sub>7</sub> H <sub>8</sub> N <sub>2</sub> O <sub>2</sub>    | 3569-99-1   | 0.46          |
| 13            | 9.16                | Paromomycin                                                       | C <sub>23</sub> H <sub>45</sub> N <sub>5</sub> O <sub>14</sub> | 7542-37-2   | 0.63          |
| 14            | 9.42                | 3-formyl-1-methyl-2(1H)-pyridone                                  | C <sub>7</sub> H <sub>7</sub> NO <sub>2</sub>                  | 79138-28-6  | 2.50          |
| 15            | 9.67                | 3-ethoxyaniline                                                   | C <sub>8</sub> H <sub>11</sub> NO                              | 621-33-0    | 5.96          |
| 16            | 10.31               | N-(furan-3-yl)acetamide                                           | C <sub>6</sub> H <sub>7</sub> NO <sub>2</sub>                  | 59445-85-1  | 2.49          |
| 17            | 11.22               | 2',3',5'-triacetyl -azacytidine                                   | C <sub>14</sub> H <sub>18</sub> N <sub>4</sub> O <sub>8</sub>  | 10302-78-0  | 9.06          |
| 18            | 11.55               | (2-oxo-1H-pyridin-3-yl) acetate                                   | C <sub>7</sub> H <sub>7</sub> NO <sub>3</sub>                  | 61296-14-8  | 1.45          |
| 19            | 12.30               | Kahweol                                                           | C <sub>20</sub> H <sub>26</sub> O <sub>3</sub>                 | 6894-43-5   | 0.43          |
| 20            | 12.59               | 5-(3'-hydroxy-n-hexyl)pyrrolidin-2-one                            | C <sub>10</sub> H <sub>19</sub> NO <sub>2</sub>                | 120782-01-6 | 0.85          |
| 21            | 13.42               | Piperidin-2-ylmethanamine                                         | C <sub>6</sub> H <sub>14</sub> N <sub>2</sub>                  | 22990-77-8  | 5.43          |
| 22            | 13.57               | N-(piperidin-4-ylmethyl)acetamide                                 | C <sub>8</sub> H <sub>16</sub> N <sub>2</sub> O                | 71207-33-5  | 1.86          |
| 23            | 14.38               | DL-pipecolic Acid                                                 | C <sub>6</sub> H <sub>11</sub> NO <sub>2</sub>                 | 535-75-1    | 4.97          |
| 24            | 14.62               | Methyl cholate                                                    | C <sub>25</sub> H <sub>42</sub> O <sub>5</sub>                 | 1448-36-8   | 0.36          |
| 25            | 14.73               | 2-hydroxycyclopentadecanone                                       | C <sub>15</sub> H <sub>28</sub> O <sub>2</sub>                 | 4727-18-8   | 0.6           |
| 26            | 15.17               | Aldehydo-muramic acid                                             | C <sub>9</sub> H <sub>17</sub> NO <sub>7</sub>                 | 1114-41-6   | 3.73          |
| 27            | 15.45               | (1R,2R)-(-)-1,2-diaminocyclohexane                                | C <sub>6</sub> H <sub>14</sub> N <sub>2</sub>                  | 20439-47-8  | 2.28          |
| 28            | 15.86               | N-(2,4-dihydroxyphenyl)acetamide                                  | C <sub>8</sub> H <sub>9</sub> NO <sub>3</sub>                  | 71516-07-9  | 0.79          |
| 29            | 16.31               | Pyrrolo[1,2-a]pyrazine-1,4-dione, hexahydro-2-methyl-, (S)- (9CI) | C <sub>8</sub> H <sub>12</sub> N <sub>2</sub> O <sub>2</sub>   | 38074-80-5  | 0.54          |
| 30            | 17.17               | 7-methyl-(Z)-8-tetradecen-1-ol acetate                            | C <sub>17</sub> H <sub>32</sub> O <sub>2</sub>                 | 959269-58-0 | 0.51          |
| 31            | 18.48               | Palmitic acid                                                     | C <sub>16</sub> H <sub>32</sub> O <sub>2</sub>                 | 57-10-3     | 0.89          |
| 32            | 20.14               | Oleic acid                                                        | C <sub>18</sub> H <sub>34</sub> O <sub>2</sub>                 | 112-80-1    | 0.87          |
| <b>730 °C</b> |                     |                                                                   |                                                                |             |               |
| 1             | 1.29                | Sarcosine                                                         | C <sub>3</sub> H <sub>7</sub> NO <sub>2</sub>                  | 107-97-1    | 4.04          |

| 2                         | 1.38                | Urea                                            | CH <sub>4</sub> N <sub>2</sub> O                                | 57-13-6     | 18.36         |
|---------------------------|---------------------|-------------------------------------------------|-----------------------------------------------------------------|-------------|---------------|
| <b>Continued Table S1</b> |                     |                                                 |                                                                 |             |               |
| Peak number #             | Reaction time (min) | Compound                                        | Molecular formula                                               | CAS#        | Peak area (%) |
| 3                         | 1.5                 | 2-cyanoacetamide                                | C <sub>3</sub> H <sub>4</sub> N <sub>2</sub> O                  | 107-91-5    | 7.14          |
| 4                         | 1.74                | Butyraldehyde                                   | C <sub>4</sub> H <sub>8</sub> O                                 | 123-72-8    | 3.36          |
| 5                         | 1.95                | N,N-dimethyl-2-(1H-1,2,4-triazol-5-yl)acetamide | C <sub>4</sub> H <sub>6</sub> N <sub>4</sub> O                  | 875239-17-1 | 6.18          |
| 6                         | 2.18                | Acetic acid                                     | C <sub>2</sub> H <sub>4</sub> O <sub>2</sub>                    | 64-19-7     | 2.32          |
| 7                         | 2.56                | 1-methyl-1H-pyrrole-2(5H)-one                   | C <sub>5</sub> H <sub>7</sub> NO                                | 13950-21-5  | 1.48          |
| 8                         | 2.73                | Pyridine                                        | C <sub>5</sub> H <sub>5</sub> N                                 | 110-86-1    | 2.22          |
| 9                         | 2.89                | Toluene                                         | C <sub>7</sub> H <sub>8</sub>                                   | 108-88-3    | 8.23          |
| 10                        | 3.18                | Oct-3-yn-1-ol                                   | C <sub>8</sub> H <sub>14</sub> O                                | 14916-80-4  | 0.74          |
| 11                        | 3.49                | 2-methylpyridine                                | C <sub>6</sub> H <sub>7</sub> N                                 | 109-06-8    | 3.01          |
| 12                        | 3.78                | (E)-1,7-dodecadiene                             | C <sub>12</sub> H <sub>22</sub>                                 | 106051-46-1 | 0.79          |
| 13                        | 3.89                | Metamizole                                      | C <sub>13</sub> H <sub>17</sub> N <sub>3</sub> O <sub>4</sub> S | 50567-35-6  | 3.15          |
| 14                        | 4.01                | (2-aminoethyl)phosphonic acid                   | C <sub>2</sub> H <sub>8</sub> NO <sub>3</sub> P                 | 2041-14-7   | 3.19          |
| 15                        | 4.47                | Styrene                                         | C <sub>8</sub> H <sub>8</sub>                                   | 100-42-5    | 1.39          |
| 16                        | 5.15                | 2,4-lutidine                                    | C <sub>7</sub> H <sub>9</sub> N                                 | 108-47-4    | 1.89          |
| 17                        | 5.73                | 3-aminobenzenethiol                             | C <sub>6</sub> H <sub>7</sub> NS                                | 22948-02-3  | 1.18          |
| 18                        | 6.03                | prop-2-enylbenzene                              | C <sub>9</sub> H <sub>10</sub>                                  | 300-57-2    | 0.75          |
| 19                        | 6.6                 | Phenyl carbamate                                | C <sub>7</sub> H <sub>7</sub> NO <sub>2</sub>                   | 622-46-8    | 0.55          |
| 20                        | 6.83                | 1H-indene                                       | C <sub>9</sub> H <sub>8</sub>                                   | 95-13-6     | 0.48          |
| 21                        | 7.52                | 2-acetylpyrrole                                 | C <sub>6</sub> H <sub>7</sub> NO                                | 1072-83-9   | 0.74          |
| 22                        | 7.9                 | p-cresol                                        | C <sub>7</sub> H <sub>8</sub> O                                 | 106-44-5    | 1.04          |
| 23                        | 8.43                | <15N>phenylacetonitrile                         | C <sub>8</sub> H <sub>7</sub> N                                 | 144987-02-0 | 1.01          |
| 24                        | 9.21                | 2-ethylphenol                                   | C <sub>8</sub> H <sub>10</sub> O                                | 90-00-6     | 0.52          |
| 25                        | 9.89                | 3-phenylpropionitrile                           | C <sub>9</sub> H <sub>9</sub> N                                 | 645-59-0    | 0.79          |
| 26                        | 10.47               | 6-methylpurine                                  | C <sub>6</sub> H <sub>6</sub> N <sub>4</sub>                    | 2004-03-7   | 0.53          |
| 27                        | 10.93               | 1H-indole                                       | C <sub>8</sub> H <sub>7</sub> N                                 | 120-72-9    | 0.8           |
| 28                        | 11.16               | 3,4-dihydro-1H-pyridin-2-one                    | C <sub>5</sub> H <sub>7</sub> NO                                | 57147-25-8  | 0.98          |
| 29                        | 12.11               | Skatole                                         | C <sub>9</sub> H <sub>9</sub> N                                 | 83-34-1     | 0.44          |
| 30                        | 13.37               | DL-pipecolic acid                               | C <sub>6</sub> H <sub>11</sub> NO <sub>2</sub>                  | 535-75-1    | 1.63          |
| 31                        | 14.3                | Piperidin-2-ylmethanamine                       | C <sub>6</sub> H <sub>14</sub> N <sub>2</sub>                   | 22990-77-8  | 1.67          |
| 32                        | 15.14               | Framycetin                                      | C <sub>23</sub> H <sub>46</sub> N <sub>6</sub> O <sub>13</sub>  | 119-04-0    | 0.33          |
| 33                        | 15.41               | 2-hexyldecyl acetate                            | C <sub>18</sub> H <sub>36</sub> O <sub>2</sub>                  | 82409-75-4  | 0.49          |

**Table S2**

Activation energies of feedstock pyrolysis process obtained from four iso-conversional methods.

| $\alpha$ | Friedman          |        | FWO               |        | KAS               |        | Starink           |        |
|----------|-------------------|--------|-------------------|--------|-------------------|--------|-------------------|--------|
|          | $E_a$<br>(kJ/mol) | $R^2$  | $E_a$<br>(kJ/mol) | $R^2$  | $E_a$<br>(kJ/mol) | $R^2$  | $E_a$<br>(kJ/mol) | $R^2$  |
| 0.05     | 62.91             | 0.9711 | 64.38             | 0.9894 | 62.10             | 0.9874 | 62.27             | 0.9875 |
| 0.1      | 72.03             | 0.9833 | 70.48             | 0.9716 | 68.01             | 0.9666 | 68.20             | 0.9668 |
| 0.15     | 66.87             | 0.9535 | 72.55             | 0.9714 | 69.82             | 0.9663 | 70.02             | 0.9665 |
| 0.2      | 47.22             | 0.6407 | 63.24             | 0.9138 | 59.55             | 0.8945 | 59.78             | 0.8954 |
| 0.25     | 67.04             | 0.848  | 57.01             | 0.7706 | 51.42             | 0.7045 | 51.72             | 0.7076 |
| 0.3      | 156.33            | 0.9866 | 133.77            | 0.9672 | 130.98            | 0.9624 | 131.26            | 0.9626 |
| 0.35     | 190.50            | 0.9909 | 164.26            | 0.9853 | 162.64            | 0.9835 | 162.92            | 0.9836 |
| 0.4      | 200.90            | 0.9957 | 182.74            | 0.9907 | 181.82            | 0.9896 | 182.09            | 0.9897 |
| 0.45     | 207.44            | 0.9984 | 191.63            | 0.9945 | 217.76            | 0.9800 | 191.26            | 0.9940 |
| 0.5      | 208.94            | 0.9964 | 196.09            | 0.9958 | 195.54            | 0.9954 | 195.81            | 0.9954 |
| 0.55     | 209.57            | 0.9945 | 200.61            | 0.9963 | 200.17            | 0.9959 | 200.45            | 0.9960 |
| 0.6      | 209.80            | 0.9954 | 204.17            | 0.9961 | 203.80            | 0.9958 | 204.08            | 0.9958 |
| 0.65     | 222.73            | 0.9826 | 206.97            | 0.9961 | 206.62            | 0.9957 | 206.90            | 0.9957 |
| 0.7      | 234.24            | 0.9938 | 214.55            | 0.9948 | 214.44            | 0.9942 | 214.71            | 0.9942 |



**Table S3**

Pre-exponential factors of feedstock pyrolysis process obtained from four iso-conversional methods.

| $\alpha$ | Friedman              | FWO                   | KAS                   | Starink               |
|----------|-----------------------|-----------------------|-----------------------|-----------------------|
|          | A (s <sup>-1</sup> )  |
| 0.05     | 2.89×10 <sup>2</sup>  | 3.88×10 <sup>2</sup>  | 2.46×10 <sup>2</sup>  | 2.55×10 <sup>2</sup>  |
| 0.1      | 1.76×10 <sup>3</sup>  | 1.30×10 <sup>3</sup>  | 7.95×10 <sup>2</sup>  | 8.26×10 <sup>2</sup>  |
| 0.15     | 6.34×10 <sup>2</sup>  | 1.95×10 <sup>3</sup>  | 1.14×10 <sup>3</sup>  | 1.18×10 <sup>3</sup>  |
| 0.2      | 1.23×10 <sup>1</sup>  | 3.09×10 <sup>2</sup>  | 1.48×10 <sup>2</sup>  | 1.55×10 <sup>2</sup>  |
| 0.25     | 6.57×10 <sup>2</sup>  | 8.92×10 <sup>1</sup>  | 2.89×10 <sup>1</sup>  | 3.07×10 <sup>1</sup>  |
| 0.3      | 1.89×10 <sup>10</sup> | 2.61×10 <sup>8</sup>  | 1.54×10 <sup>8</sup>  | 1.62×10 <sup>8</sup>  |
| 0.35     | 1.19×10 <sup>13</sup> | 8.47×10 <sup>10</sup> | 6.25×10 <sup>10</sup> | 6.58×10 <sup>10</sup> |
| 0.4      | 8.43×10 <sup>13</sup> | 2.77×10 <sup>10</sup> | 2.33×10 <sup>12</sup> | 2.45×10 <sup>12</sup> |
| 0.45     | 2.88×10 <sup>14</sup> | 1.48×10 <sup>13</sup> | 2.00×10 <sup>15</sup> | 1.38×10 <sup>13</sup> |
| 0.5      | 3.82×10 <sup>14</sup> | 3.42×10 <sup>13</sup> | 3.08×10 <sup>13</sup> | 3.24×10 <sup>13</sup> |
| 0.55     | 4.29×10 <sup>14</sup> | 7.98×10 <sup>13</sup> | 7.35×10 <sup>13</sup> | 7.74×10 <sup>13</sup> |
| 0.6      | 4.48×10 <sup>14</sup> | 1.56×10 <sup>14</sup> | 1.45×10 <sup>14</sup> | 1.53×10 <sup>14</sup> |
| 0.65     | 5.06×10 <sup>15</sup> | 2.64×10 <sup>14</sup> | 2.47×10 <sup>14</sup> | 2.60×10 <sup>14</sup> |
| 0.7      | 4.37×10 <sup>16</sup> | 1.09×10 <sup>15</sup> | 1.07×10 <sup>15</sup> | 1.13×10 <sup>15</sup> |

**Table S4**Algebraic expressions of  $f(\alpha)$  and  $g(\alpha)$  for the most common solid-state reaction mechanisms.

| Reaction mechanism                                                                        | Symbol | $f(\alpha)$                                        | $g(\alpha)$                         |
|-------------------------------------------------------------------------------------------|--------|----------------------------------------------------|-------------------------------------|
| <b>Reaction order</b>                                                                     |        |                                                    |                                     |
| Zero-order                                                                                | F0     | 1                                                  | $\alpha$                            |
| First-order<br>(instantaneous nucleation and<br>unidimensional growth)                    | F1     | $(1-\alpha)$                                       | $-\ln(1-\alpha)$                    |
| Second-order                                                                              | F2     | $(1-\alpha)^2$                                     | $(1-\alpha)^{-1}-1$                 |
| Third-order                                                                               | F3     | $(1-\alpha)^3$                                     | $[(1-\alpha)^{-2}-1]/2$             |
| <b>Nucleation</b>                                                                         |        |                                                    |                                     |
| Johnson-Mehl-Avrami equation<br>(random nucleation and growth of<br>nuclei)               | $A_m$  | $m(1-\alpha) [-\ln(1-\alpha)]^{1-1/m}$             | $[-\ln(1-\alpha)]^{1/m}$            |
| <b>Diffusion</b>                                                                          |        |                                                    |                                     |
| One-dimensional diffusion                                                                 | D1     | $1/(2\alpha)$                                      | $\alpha^2$                          |
| Two-dimensional diffusion<br>(bidimensional particle shape) (Valensi)                     | D2     | $[-\ln(1-\alpha)]^{-1}$                            | $(1-\alpha) \ln(1-\alpha) + \alpha$ |
| Three-dimensional diffusion<br>(tridimensional particle shape) (Jander)                   | D3     | $(3/2) (1-\alpha)^{2/3} [1-(1-\alpha)^{1/3}]^{-1}$ | $[1-(1-\alpha)^{1/3}]^2$            |
| Three-dimensional diffusion<br>(tridimensional particle shape) (Ginstling-<br>Bronshtein) | D4     | $(3/2) [(1-\alpha)^{-1/3}-1]^{-1}$                 | $(1-2\alpha/3)-(1-\alpha)^{2/3}$    |
| <b>Contracting geometry</b>                                                               |        |                                                    |                                     |
| Contracting cylinder                                                                      | R2     | $2(1-\alpha)^{1/2}$                                | $1-(1-\alpha)^{1/2}$                |
| Contracting sphere                                                                        | R3     | $3(1-\alpha)^{2/3}$                                | $1-(1-\alpha)^{1/3}$                |

**Table S5**

Thermodynamic parameters of feedstock pyrolysis process at the heating rate of 10 °C/min.

| $\alpha$ | Friedman               |                        |                           | FWO                    |                        |                           | KAS                    |                        |                           | Starink                |                        |                           |
|----------|------------------------|------------------------|---------------------------|------------------------|------------------------|---------------------------|------------------------|------------------------|---------------------------|------------------------|------------------------|---------------------------|
|          | $\Delta H$<br>(kJ/mol) | $\Delta G$<br>(kJ/mol) | $\Delta S$<br>(J/(mol K)) | $\Delta H$<br>(kJ/mol) | $\Delta G$<br>(kJ/mol) | $\Delta S$<br>(J/(mol K)) | $\Delta H$<br>(kJ/mol) | $\Delta G$<br>(kJ/mol) | $\Delta S$<br>(J/(mol K)) | $\Delta H$<br>(kJ/mol) | $\Delta G$<br>(kJ/mol) | $\Delta S$<br>(J/(mol K)) |
| 0.05     | 60.07                  | 197.32                 | -208.69                   | 61.55                  | 197.19                 | -206.24                   | 59.26                  | 197.39                 | -210.02                   | 59.44                  | 197.37                 | -209.73                   |
| 0.1      | 68.93                  | 196.58                 | -194.09                   | 67.38                  | 196.69                 | -196.62                   | 64.91                  | 196.89                 | -200.68                   | 65.10                  | 196.87                 | -200.36                   |
| 0.15     | 63.56                  | 196.98                 | -202.85                   | 69.26                  | 196.54                 | -193.52                   | 66.53                  | 196.75                 | -198.00                   | 66.73                  | 196.73                 | -197.67                   |
| 0.2      | 43.66                  | 198.88                 | -236.02                   | 59.68                  | 197.29                 | -209.24                   | 55.99                  | 197.62                 | -215.35                   | 56.22                  | 197.60                 | -214.96                   |
| 0.25     | 62.61                  | 196.97                 | -204.30                   | 52.58                  | 197.85                 | -220.89                   | 46.98                  | 198.42                 | -230.26                   | 47.28                  | 198.39                 | -229.76                   |
| 0.3      | 151.4<br>1             | 192.34                 | -62.23                    | 128.85                 | 193.19                 | -97.83                    | 126.06                 | 193.31                 |                           |                        |                        |                           |
|          |                        |                        |                           |                        |                        |                           |                        |                        | -102.26                   | 126.34                 | 193.29                 | -101.80                   |
| 0.35     | 185.3<br>9             | 191.26                 | -8.92                     | 159.15                 | 192.07                 | -50.05                    | 157.54                 | 192.12                 |                           |                        |                        |                           |
|          |                        |                        |                           |                        |                        |                           |                        |                        | -52.59                    | 157.81                 | 192.11                 | -52.16                    |
| 0.4      | 195.6<br>6             | 190.97                 | 7.14                      | 177.50                 | 191.49                 | -21.27                    | 176.58                 | 191.51                 |                           |                        |                        |                           |
|          |                        |                        |                           |                        |                        |                           |                        |                        | -22.71                    | 176.85                 | 191.51                 | -22.28                    |
| 0.45     | 202.1<br>1             | 190.79                 | 17.21                     | 186.31                 | 191.23                 | -7.48                     | 212.44                 | 190.53                 |                           |                        |                        |                           |
|          |                        |                        |                           |                        |                        |                           |                        |                        | 33.31                     | 185.93                 | 191.24                 | -8.07                     |
| 0.5      | 203.5<br>5             | 190.75                 | 19.46                     | 190.70                 | 191.10                 | -0.61                     | 190.14                 | 191.12                 |                           |                        |                        |                           |
|          |                        |                        |                           |                        |                        |                           |                        |                        | -1.48                     | 190.42                 | 191.11                 | -1.05                     |
| 0.55     | 204.1<br>2             | 190.74                 | 20.34                     | 195.16                 | 190.98                 | 6.36                      | 194.72                 | 190.99                 |                           |                        |                        |                           |
|          |                        |                        |                           |                        |                        |                           |                        |                        | 5.67                      | 194.99                 | 190.98                 | 6.10                      |
| 0.6      | 204.2<br>9             | 190.73                 | 20.61                     | 198.66                 | 190.88                 | 11.83                     | 198.29                 | 190.89                 |                           |                        |                        |                           |
|          |                        |                        |                           |                        |                        |                           |                        |                        | 11.25                     | 198.57                 | 190.88                 | 11.68                     |
| 0.65     | 217.1<br>5             | 190.40                 | 40.67                     | 201.40                 | 190.80                 | 16.11                     | 201.04                 | 190.81                 |                           |                        |                        |                           |
|          |                        |                        |                           |                        |                        |                           |                        |                        | 15.55                     | 201.32                 | 190.81                 | 15.99                     |
| 0.7      | 228.5<br>9             | 190.13                 | 58.49                     | 208.91                 | 190.61                 | 27.82                     | 208.79                 | 190.61                 |                           |                        |                        |                           |
|          |                        |                        |                           |                        |                        |                           |                        |                        | 27.64                     | 209.07                 | 190.60                 | 28.07                     |

**Table S6**

Average values of activation energies and enthalpy changes of WCS pyrolysis process at different conversion rates.

| Conversion rate ( $\alpha$ ) | Average $E_a$<br>(kJ/mol) | Average $\Delta H$<br>(kJ/mol) |
|------------------------------|---------------------------|--------------------------------|
| 0.05                         | 62.92                     | 60.08                          |
| 0.1                          | 69.68                     | 66.58                          |
| 0.15                         | 69.81                     | 66.52                          |
| 0.2                          | 57.45                     | 53.89                          |
| 0.25                         | 56.80                     | 52.36                          |
| 0.3                          | 138.08                    | 133.17                         |
| 0.35                         | 170.08                    | 164.97                         |
| 0.4                          | 186.89                    | 181.65                         |
| 0.45                         | 202.02                    | 196.70                         |
| 0.5                          | 199.10                    | 193.70                         |
| 0.55                         | 202.70                    | 197.25                         |
| 0.6                          | 205.46                    | 199.95                         |
| 0.65                         | 210.80                    | 205.23                         |
| 0.7                          | 219.49                    | 213.84                         |
